# Supplementary material for: Effect of proton pump inhibitors on the clinical outcomes of PD-1/PD-L1 inhibitor in solid cancer patients
Source: PubMed Central journal article supplement (PMC10980492; doi:10.1097/md.0000000000030532), 2022-09-09
Supplement: medi-101-e30532-s002.pdf [file medi-101-e30532-s002.pdf]

1 Table S1 NOS quality assessment of included studies.

| Study             | Selection <sup>1</sup> |   |   | Comparability <sup>2</sup> |    | Outcome <sup>3</sup> |   |   | Score <sup>4</sup> |
|-------------------|------------------------|---|---|----------------------------|----|----------------------|---|---|--------------------|
|                   | A                      | B | C | D                          | E  | F                    | G | H |                    |
| Chalabi 2020      | ☆                      | ☆ | ☆ |                            | ☆☆ | ☆                    | ☆ | ☆ | 8                  |
| Hopkins 2020      | ☆                      | ☆ | ☆ |                            | ☆☆ | ☆                    | ☆ | ☆ | 8                  |
| Cortellini 2021   | ☆                      | ☆ | ☆ |                            | ☆☆ | ☆                    | ☆ | ☆ | 8                  |
| Cortellini 2021-2 | ☆                      | ☆ | ☆ |                            | ☆☆ | ☆                    | ☆ | ☆ | 8                  |
| Svaton 2020       | ☆                      | ☆ | ☆ |                            | ☆☆ | ☆                    | ☆ |   | 7                  |
| Peng 2021         | ☆                      | ☆ | ☆ |                            | ☆  | ☆                    | ☆ | ☆ | 7                  |
| Ruiz-Bañobre 2021 | ☆                      | ☆ | ☆ |                            | ☆  | ☆                    | ☆ | ☆ | 7                  |
| Zhao 2019         | ☆                      | ☆ | ☆ |                            | ☆☆ | ☆                    | ☆ | ☆ | 8                  |

2 NOS=Newcastle-Ottawa Quality Assessment Scale.
