# Supplementary material for: Effect of proton pump inhibitors on the clinical outcomes of PD-1/PD-L1 inhibitor in solid cancer patients
Source: PubMed Central journal article supplement (PMC10980492; doi:10.1097/md.0000000000030532), 2022-09-09

Figure S2 Sensitivity analysis of OS and (A) PFS (B).

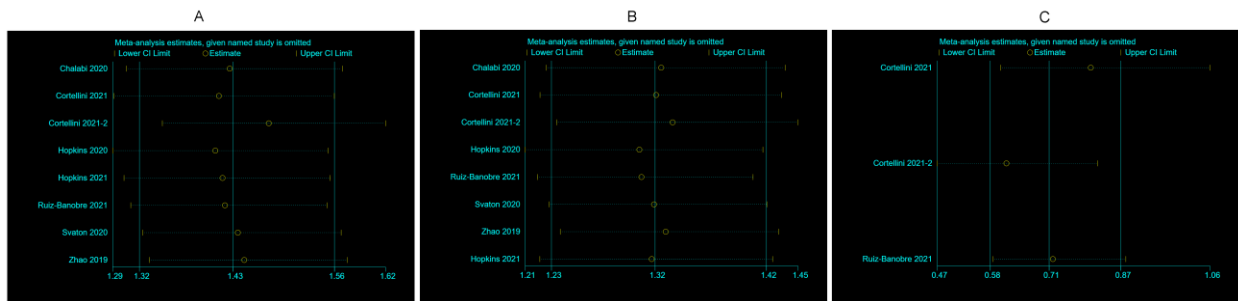

Supplement: medi-101-e30532-s003.pdf [file medi-101-e30532-s003.pdf]
